# Supplementary material
Source: ML conference proceedings conference paper supplement (https://proceedings.neurips.cc/paper_files/paper/2022/hash/c5169260ef32d1bd3597c14d8c89b034-Abstract.html)
Supplement: Supplementary file 1 [file c5169260ef32d1bd3597c14d8c89b034-Supplemental-Conference.pdf]

---

# DualCoOp: Fast Adaptation to Multi-Label Recognition with Limited Annotations (Supplementary Material)

---

Ximeng Sun<sup>1</sup> Ping Hu<sup>1</sup> Kate Saenko<sup>1,2</sup>

<sup>1</sup>Boston University, <sup>2</sup>MIT-IBM Watson AI Lab, IBM Research  
{sunxm, pinghu, saenko}@bu.edu

## A Different Prompt Length

We have provided the comparison of the performance of DualCoOp with different lengths of prompt context (i.e.  $N = 2, 4, 6, 8, 16, 32, 64$ ) in all three different experiment scenarios (see Fig. 1 and 2). In MLR with partial labels, we learn class-specific prompts and thus DualCoOp performs good when  $N$  is small, such as 8, 16. For zero-shot learning in MLR, we learn uniform prompts shared by all classes and it requires larger  $N$  (e.g. 32 or 64) for good performance. In the main paper, we use  $N = 16$  for all experiments of MLR with partial labels and use  $N = 32$  for experiments in zero-shot learning.

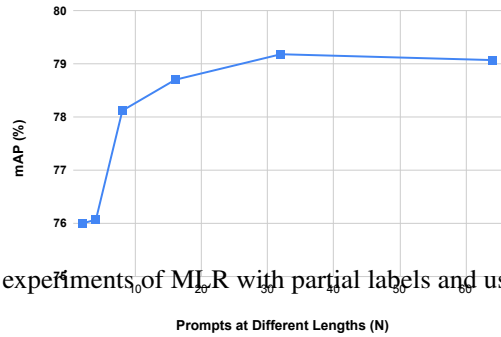

Figure 1: MLR with Partial Labels at Different Prompt Length on MS-COCO [3]

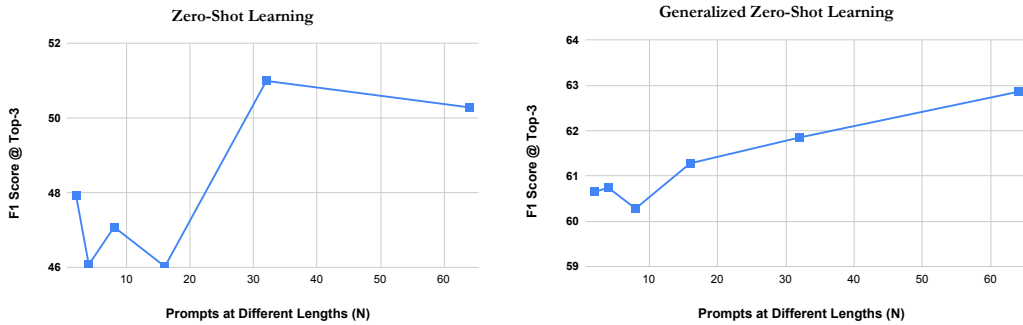

Figure 2: Zero-Shot MLR with Different Prompt Length on MS-COCO [3]

In the main paper, we set  $N_+ = N_-$  for simplicity. Here, we conduct experiments in both partial-label MLC and Zero-Shot MLC settings to check the performance of different  $N_-$ s by controlling the  $N_+$  as the same. As shown Table 1 and 2, F1-Score generally improves with larger  $N_-$  in both partial label and zero-shot settings.

Table 1: Performance of different  $N$ -s with 10% labels on MS-COCO

| $(N_+, N_-)$ | CP   | CR   | CF1  | OP   | OR   | OF1  | mAP  |
|--------------|------|------|------|------|------|------|------|
| (16, 2)      | 67.1 | 77.9 | 71.8 | 69.8 | 82.2 | 75.5 | 78.7 |
| (16, 4)      | 67.7 | 77.6 | 72.1 | 70.3 | 81.8 | 75.6 | 78.7 |
| (16, 8)      | 68.4 | 77.8 | 72.6 | 70.9 | 81.8 | 76.0 | 78.9 |
| (16, 16)     | 69.1 | 77.5 | 72.6 | 71.4 | 81.6 | 76.2 | 78.7 |

Table 2: Zero-Shot performance of different  $N$ -s on MS-COCO

| $(N_+, N_-)$ | ZS-P | ZS-R | ZS-F1 | GZS-P | GZS-R | GZS-F1 |
|--------------|------|------|-------|-------|-------|--------|
| (32, 2)      | 31.2 | 77.4 | 44.4  | 55.1  | 64.3  | 59.3   |
| (32, 4)      | 33.1 | 82.1 | 47.1  | 57.1  | 66.6  | 61.5   |
| (32, 8)      | 34.0 | 84.4 | 48.4  | 57.6  | 67.2  | 62.0   |
| (32, 16)     | 34.8 | 86.6 | 49.7  | 57.5  | 67.1  | 61.9   |
| (32, 32)     | 35.8 | 88.9 | 51.0  | 57.4  | 67.0  | 61.9   |

## B Full performance of MLR with Partial Labels

In this section, we provide the average per-class and average overall precisions (CP and OP), recalls (CR and oR) and F1 scores (CF1 and OF1) of DualCoOp in the experiment of MLR with Partial Labels on MS-COCO [3], VOC2007 [2] and BigEarth [1] (see Table 3, 4 and 5 in supplementary material) as a supplementary for Table ?? and ?? in the main paper.

## C Visualization of Class-Specific Region Feature Aggregation

We have visualized the class-specific region feature aggregation on MS-COCO dataset (in Fig. 3). We can see DualCoOp generates the high attention score at the correct objects.

Table 3: Performance of MLR with partial labels on MS-COCO

| Amount of Labels             | CP   | CR   | CF1  | OP   | OR   | OF1  | mAP  |
|------------------------------|------|------|------|------|------|------|------|
| 10%                          | 69.1 | 77.5 | 72.6 | 71.4 | 81.6 | 76.2 | 78.7 |
| 20%                          | 70.1 | 79.4 | 74.2 | 72.1 | 83.0 | 77.2 | 80.9 |
| 30%                          | 71.2 | 80.1 | 75.1 | 72.9 | 83.5 | 77.8 | 81.7 |
| 40%                          | 71.3 | 80.2 | 75.2 | 73.2 | 83.8 | 78.1 | 82.0 |
| 50%                          | 72.1 | 80.4 | 75.8 | 73.7 | 83.9 | 78.5 | 82.5 |
| 60%                          | 72.4 | 80.6 | 76.0 | 73.9 | 84.0 | 78.6 | 82.7 |
| 70%                          | 72.5 | 80.5 | 76.1 | 74.1 | 83.9 | 78.7 | 82.8 |
| 80%                          | 72.9 | 80.7 | 76.3 | 74.3 | 84.1 | 78.9 | 83.0 |
| 90%                          | 72.9 | 80.7 | 76.4 | 74.5 | 84.1 | 79.0 | 83.1 |
| 100% (No Finetune)           | 73.2 | 80.8 | 76.6 | 74.6 | 84.2 | 79.1 | 83.2 |
| 100% (Finetune Aggre. Func.) | 75.7 | 80.4 | 77.8 | 77.1 | 83.7 | 80.3 | 84.2 |
| 100% (Finetune Img. Enc.)    | 92.5 | 68.0 | 77.3 | 93.5 | 70.8 | 80.6 | 85.3 |

Table 4: Performance of MLR with partial labels on VOC2007

| Amount of Labels   | CP   | CR   | CF1  | OP   | OR   | OF1  | mAP  |
|--------------------|------|------|------|------|------|------|------|
| 10%                | 69.6 | 91.3 | 78.0 | 72.4 | 92.4 | 81.2 | 90.3 |
| 20%                | 74.2 | 92.6 | 81.7 | 76.2 | 93.6 | 84.0 | 92.2 |
| 30%                | 74.9 | 92.8 | 82.3 | 78.6 | 93.3 | 85.3 | 92.8 |
| 40%                | 78.4 | 92.5 | 84.5 | 80.8 | 93.3 | 86.6 | 93.3 |
| 50%                | 80.6 | 93.4 | 86.3 | 82.4 | 94.0 | 87.8 | 93.6 |
| 60%                | 80.1 | 93.7 | 86.0 | 81.4 | 94.4 | 87.4 | 93.9 |
| 70%                | 80.9 | 93.4 | 86.5 | 82.7 | 94.0 | 88.0 | 94.0 |
| 80%                | 80.8 | 93.8 | 86.5 | 82.9 | 94.2 | 88.2 | 94.1 |
| 90%                | 80.5 | 93.9 | 86.3 | 82.4 | 94.4 | 88.0 | 94.2 |
| 100% (No Finetune) | 81.2 | 94.1 | 86.8 | 83.2 | 94.5 | 88.5 | 94.4 |

Table 5: Performance of MLR with partial labels on BigEarthn

| Amount of Labels   | CP   | CR   | CF1  | OP   | OR   | OF1  | mAP  |
|--------------------|------|------|------|------|------|------|------|
| 10%                | 76.9 | 84.3 | 78.8 | 71.9 | 85.9 | 78.3 | 88.2 |
| 20%                | 81.6 | 94.2 | 86.9 | 73.4 | 93.1 | 82.1 | 92.9 |
| 30%                | 83.7 | 93.1 | 87.4 | 75.7 | 92.5 | 83.3 | 93.1 |
| 40%                | 82.7 | 93.9 | 87.2 | 75.8 | 92.0 | 83.1 | 93.5 |
| 50%                | 81.3 | 93.2 | 85.9 | 74.4 | 90.4 | 81.6 | 93.7 |
| 60%                | 86.2 | 92.3 | 88.9 | 80.2 | 91.1 | 85.3 | 94.3 |
| 70%                | 86.0 | 92.8 | 88.8 | 79.4 | 91.7 | 85.1 | 94.2 |
| 80%                | 85.1 | 94.8 | 89.2 | 77.9 | 93.2 | 84.9 | 94.1 |
| 90%                | 83.9 | 94.4 | 88.2 | 77.2 | 93.4 | 84.5 | 94.7 |
| 100% (No Finetune) | 85.8 | 95.5 | 90.0 | 78.7 | 93.8 | 85.6 | 95.2 |

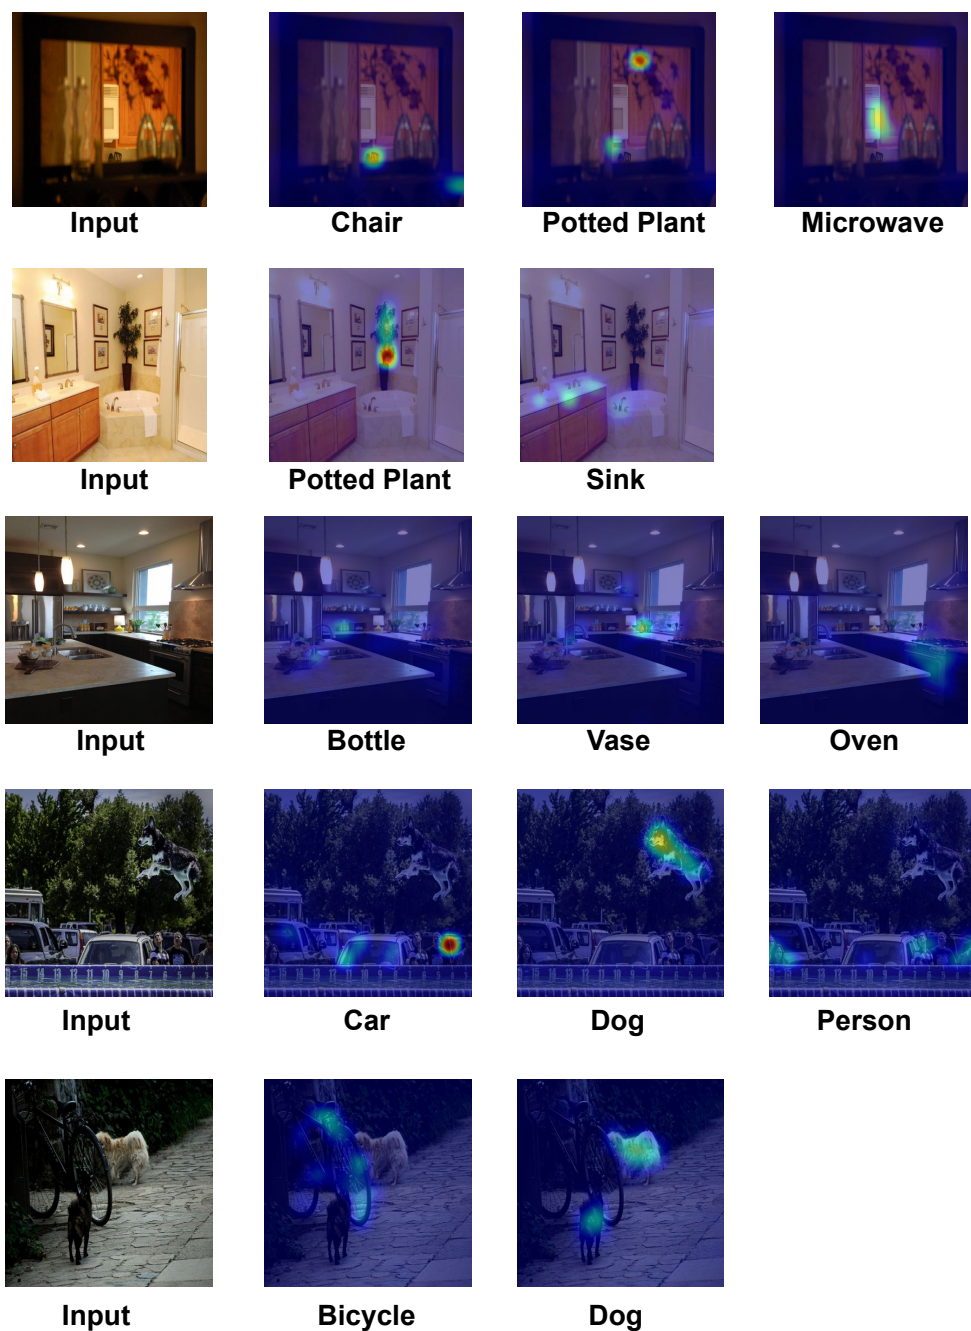

Figure 3: Visualization of Class-Specific Region Feature Aggregation

## References

- [1] Bindita Chaudhuri, Begüm Demir, Subhasis Chaudhuri, and Lorenzo Bruzzone. Multilabel remote sensing image retrieval using a semisupervised graph-theoretic method. *IEEE Transactions on Geoscience and Remote Sensing*, 56(2):1144–1158, 2018.
- [2] Mark Everingham, Luc Van Gool, Christopher KI Williams, John Winn, and Andrew Zisserman. The pascal visual object classes (voc) challenge. *IJCV*, 88(2):303–338, 2010.
- [3] Tsung-Yi Lin, Michael Maire, Serge Belongie, James Hays, Pietro Perona, Deva Ramanan, Piotr Dollár, and C Lawrence Zitnick. Microsoft coco: Common objects in context. In *ECCV*, 2014.
